# Supplementary material for: Development and Evaluation of an Anti-Biotin Interference Method in Biotin-Streptavidin Immunoassays
Source: MDPI journal article supplement (doi:10.3390/diagnostics12071729), 2022-07-16
Supplement: s1 [file s1]

**Table S1.** Original reagent information and dosage for preparing mixed reagents.

| Parameter                                                                                                 | R1 Volume (mL) | R2 Volume (mL) | Reference No. | Lot No.  |
|-----------------------------------------------------------------------------------------------------------|----------------|----------------|---------------|----------|
| <i>Composition of sandwich method mixed reagent (total volume: mixed R1 = 20ml, mixed R2 = 20ml)</i>      |                |                |               |          |
| $\beta$ -hCG                                                                                              | 2              | 2              | 03271749190   | 45406003 |
| AFP                                                                                                       | 2              | 2              | 04481798190   | 47350303 |
| CA125                                                                                                     | 2              | 2              | 11776223190   | 48833701 |
| CA199                                                                                                     | 2              | 2              | 11776193122   | 50267101 |
| CEA                                                                                                       | 2              | 2              | 11731629322   | 50005801 |
| Cyfra21-1                                                                                                 | 2              | 2              | 11820966122   | 45526402 |
| NSE                                                                                                       | 2              | 2              | 12133113122   | 47064401 |
| FPSA                                                                                                      | 2              | 2              | 03289788190   | 49578901 |
| TPSA                                                                                                      | 2              | 2              | 08791686190   | 50654701 |
| TSH                                                                                                       | 2              | 2              | 08429324190   | 48422903 |
| <i>Composition of competitive method mixed reagent (total volume: mixed R1 = 12 ml, mixed R2 = 12 ml)</i> |                |                |               |          |
| FT3                                                                                                       | 2.4            | 2.4            | 06437206190   | 47337201 |
| FT4                                                                                                       | 2.4            | 2.4            | 07976836190   | 47808501 |
| Prog                                                                                                      | 2.4            | 2.4            | 07092539190   | 47811003 |
| T3                                                                                                        | 2.4            | 2.4            | 11731360122   | 48098701 |
| T4                                                                                                        | 2.4            | 2.4            | 12017709122   | 47223602 |

$\beta$ -hCG:  $\beta$ -human chorionic gonadotropin, AFP: Alpha 1-fetoprotein, CA125: Cancer antigen 125, CA199: Carbohydrate antigen 19-9, CEA: Carcinoembryonic antigen, FPSA: Free prostate-specific antigen, TPSA: Total prostate-specific antigen, NSE: Neuron-specific enolase, TSH: Thyroid-stimulating hormone, FT3: Free triiodothyronine, FT4: Free thyroxine, PROG: Progesterone, T3: Triiodothyronine, T4: Thyroxine.
