# Supplementary material for: Development and Evaluation of an Anti-Biotin Interference Method in Biotin-Streptavidin Immunoassays
Source: MDPI journal article supplement (doi:10.3390/diagnostics12071729), 2022-07-16
Supplement: s1 [file s1]

**Table S2.** Results of biotin concentration detection

| Assays           | Levels  | Biotin concentration (ng/mL) |                          |                           |
|------------------|---------|------------------------------|--------------------------|---------------------------|
|                  |         | 0 ng/mL biotin added         | 5,000 ng/mL biotin added | 10,000 ng/mL biotin added |
| β-hCG<br>(IU/L)  | Level-1 | 0.35                         | 489                      | 915                       |
|                  | Level-2 | 0.18                         | 471                      | 931                       |
|                  | Level-3 | 0.22                         | 457                      | 908                       |
| Prog<br>(nmol/L) | Level-1 | 0.32                         | 466                      | 926                       |
|                  | Level-2 | 0.32                         | 466                      | 966                       |
|                  | Level-3 | 0.42                         | 480                      | 895                       |

The concentration of β-hCG levels 1–3 are 42.62, 499.4, and 8,566 IU/L. The concentration of Prog levels 1–3 are 3.55, 54.05, and 157.5 nmol/L.
